# Supplementary material for: CGD: Comprehensive guide designer for CRISPR-Cas systems
Source: PubMed Central journal article supplement — Comput Struct Biotechnol J. 2020 Mar 25;18:814–20. doi: 10.1016/j.csbj.2020.03.020 (PMC7152703; doi:10.1016/j.csbj.2020.03.020), 2020-03-25
Supplement: mmc2.pdf [file mmc2.pdf]

# Supplementary Figure 1

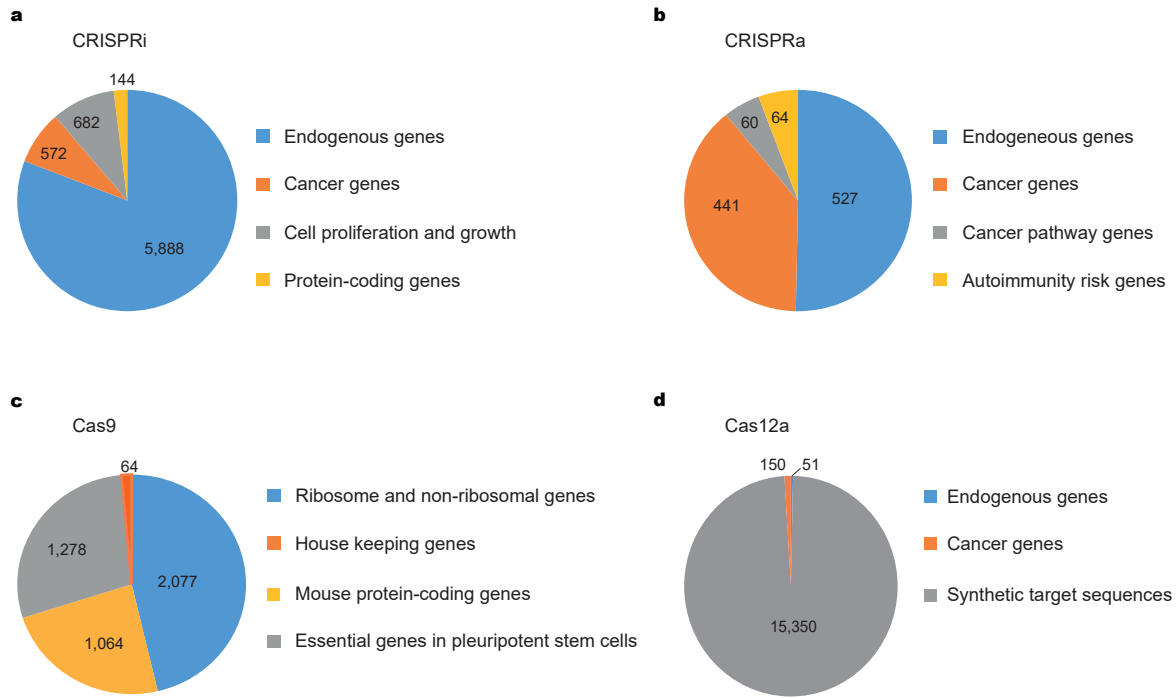

**Supplementary Figure 1 :Distribution of target sequence types in different CRISPR-Cas resources. a-d** The pie charts depict the relative frequency of classes of genes or sequences targeted by gRNAs in experiments involving CRISPRi (**a**), CRISPRa (**b**), Cas9 (**c**), and Cas12a (**d**).
