# Supplementary material for: CGD: Comprehensive guide designer for CRISPR-Cas systems
Source: PubMed Central journal article supplement — Comput Struct Biotechnol J. 2020 Mar 25;18:814–20. doi: 10.1016/j.csbj.2020.03.020 (PMC7152703; doi:10.1016/j.csbj.2020.03.020), 2020-03-25
Supplement: mmc3.pdf [file mmc3.pdf]

**Supplementary Figure 2**

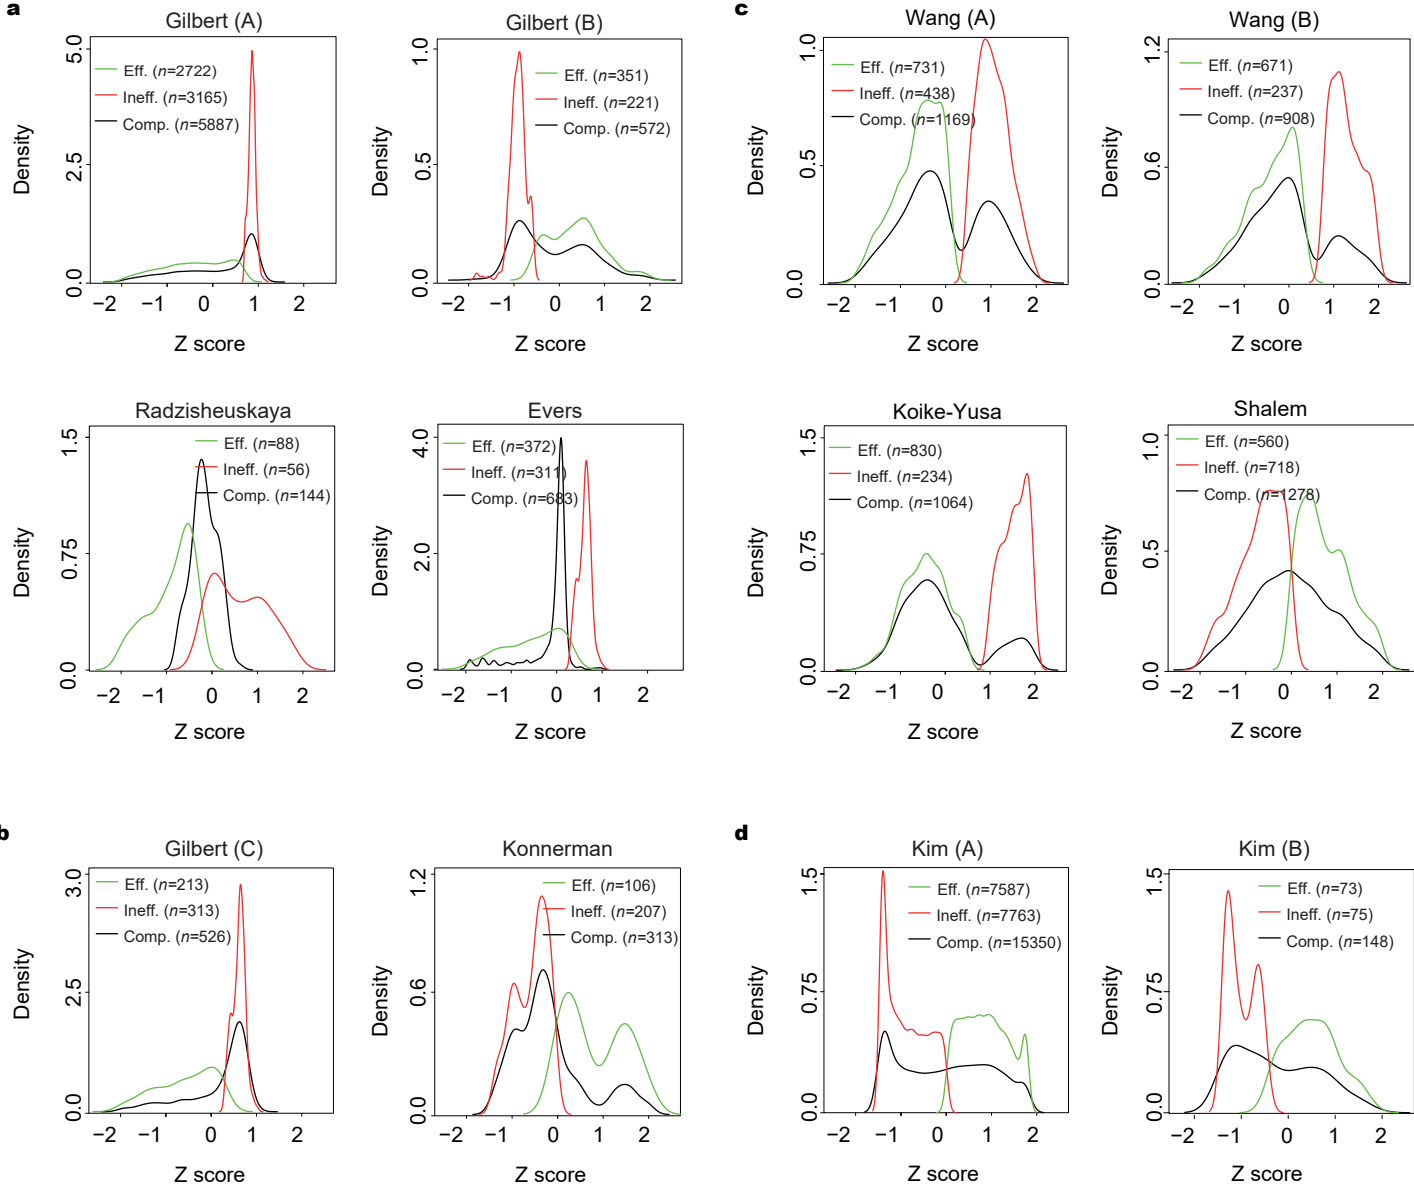

**Supplementary Figure 2: Density distributions for categorizing efficient and inefficient gRNAs across CRISPR datasets. a-d**

Representations of gRNA distributions in datasets generated using CRISPRi (a), CRISPRa (b), Cas9 (c), and Cas12a (d) systems. Green curve represents the number of efficient gRNAs in the dataset, red curve represents the number of inefficient gRNAs in the dataset, and black curve represents the total number of gRNAs in the dataset. The x-axis and y-axis denote the Z score and density, respectively.
