# Supplementary material for: CGD: Comprehensive guide designer for CRISPR-Cas systems
Source: PubMed Central journal article supplement — Comput Struct Biotechnol J. 2020 Mar 25;18:814–20. doi: 10.1016/j.csbj.2020.03.020 (PMC7152703; doi:10.1016/j.csbj.2020.03.020), 2020-03-25
Supplement: mmc5.pdf [file mmc5.pdf]

### Supplementary Figure 3

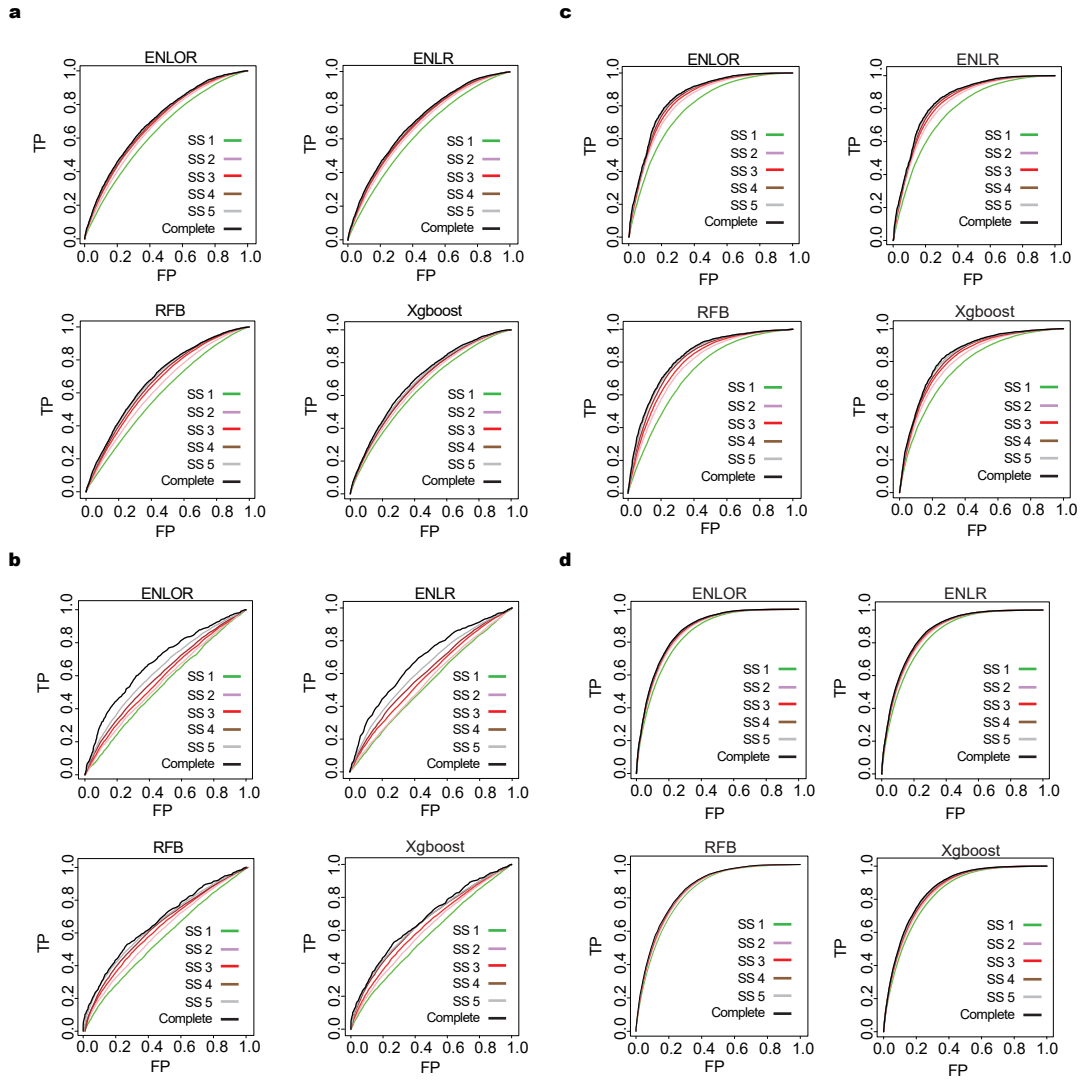

**Supplementary Figure 3: Performance analysis using subsets of the training dataset.** **a-d** ROC curves depicting the algorithm performance on each subset (SS1..5) as well as the complete training datasets for CRISPRi (**a**), CRISPRa (**b**), Cas9 (**c**), and Cas12a (**d**). The *x-axis* represents the average False Positive rate (FP) whereas the *y-axis* represents the average True Positive rate (TP)
