# Supplementary material for: CGD: Comprehensive guide designer for CRISPR-Cas systems
Source: PubMed Central journal article supplement — Comput Struct Biotechnol J. 2020 Mar 25;18:814–20. doi: 10.1016/j.csbj.2020.03.020 (PMC7152703; doi:10.1016/j.csbj.2020.03.020), 2020-03-25
Supplement: mmc6.pdf [file mmc6.pdf]

## Supplementary Figure 4

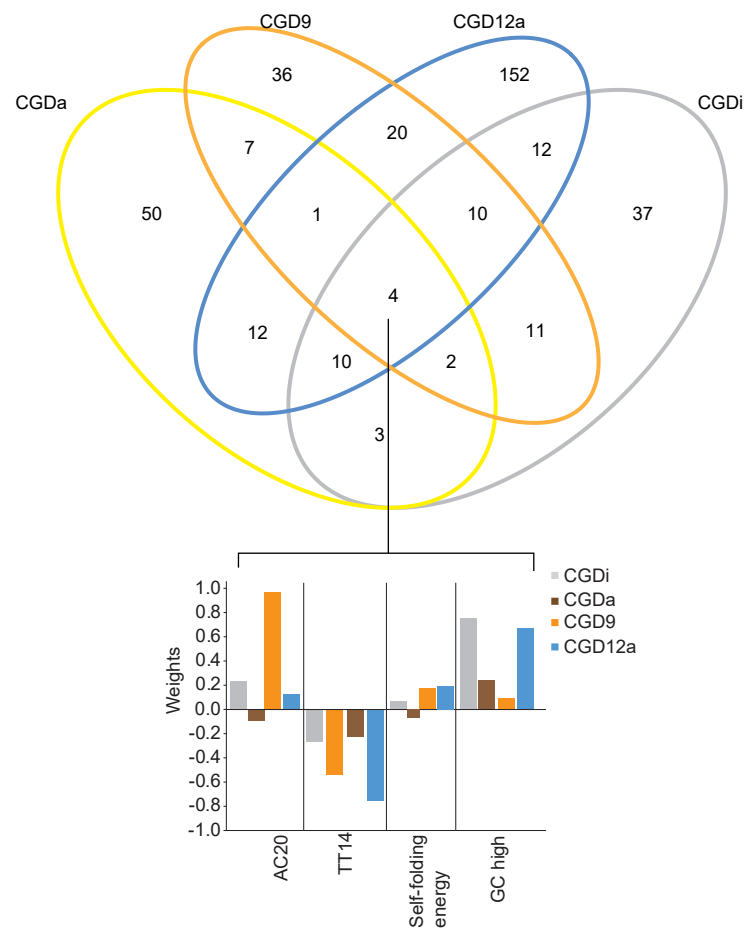

**Supplementary Figure 4 : Unique and shared features of CRISPR systems relevant to gRNA activity. (Top)** Venn diagram depicting the cluster of features that are shared among CRISPR systems (CRISPRi:  $n = 83$ , CRISPRa:  $n = 82$ , Cas9:  $n = 84$ , Cas12a:  $n = 215$ , where  $n$  represents the number of features selected in each system using ENLOR algorithms). **(Bottom)** Depiction of the features that are fully shared among all systems ( $x$ -axis), together with their weights ( $y$ -axis) generated using the ENLOR method.
